# Supplementary material
Source: PubMed Central journal article supplement (PMC5713900)
Supplement: NIHMS923202-supplement-SI.pdf [file NIHMS923202-supplement-SI.pdf]

**Supporting Information**

**All-Atom Continuous Constant pH Molecular  
Dynamics With Particle Mesh Ewald and  
Titratable Water**

Yandong Huang,<sup>†</sup> Wei Chen,<sup>†</sup> Jason A. Wallace,<sup>‡</sup> and Jana Shen<sup>\*,†</sup>

<sup>†</sup> *Department of Pharmaceutical Sciences, University of Maryland School of Pharmacy,  
Baltimore, MD*

<sup>‡</sup> *University of Oklahoma College of Dentistry, Oklahoma City, OK*

E-mail: [jshen@rx.umaryland.edu](mailto:jshen@rx.umaryland.edu)

## Calculation of the finite-size $pK_a$ corrections

We calculated the  $pK_a$  corrections using the following equations (Eqs. 15 and 16 in the main text).

$$\Delta\Delta G^{\text{offset}} = \frac{2\pi}{3} \kappa \gamma^{\text{solv}} Q \left( \frac{N_{\text{prot}}^{\text{solv}}}{V_{\text{prot}}} - \frac{N_{\text{mod}}^{\text{solv}}}{V_{\text{mod}}} \right) \quad (15)$$

$$\Delta pK_a^{\text{corr}} = \pm \frac{\Delta\Delta G^{\text{offset}}}{\ln(10)RT}, \quad (16)$$

where  $\gamma^{\text{solv}}$  is  $0.764 \text{ e} \cdot \text{\AA}^2$ ;  $Q$  is -1 for acidic groups and +1 for basic groups;  $V$  for protein and model compound and  $N^{\text{solv}}$  are given in Table S1.

It would be desirable to calculate  $\Delta pK_a^{\text{corr}}$  before simulations using the lattice-parameter-based volume (see Table S1,  $V^{\text{est}} = L^3$  for a cubic box and  $V^{\text{est}} = 0.77L^3$  for a truncated octahedron box). However, the actual simulation box volume  $V^{\text{sim}}$  is consistently smaller than  $V^{\text{est}}$ , because after the equilibration water interacts with the solute (protein or model compound) and takes up less volume (see Table S1, last column). The ratio between  $V^{\text{sim}}$  and  $V^{\text{est}}$  is about 0.93 and slightly varies depending on the system (see Table S1, last column). Thus, we decided to estimate  $\Delta pK_a^{\text{corr}}$  using  $0.93 \times V_{\text{prot}}^{\text{est}}$ , while the volume for the model compound system is taken from the simulation. Table S2 compares the estimated  $\Delta pK_a^{\text{corr}}$  with that calculated using the simulation volume for the four test proteins. As can be seen, the estimated  $pK_a$  corrections are very close to those calculated using the actual simulation volume if rounding to the first decimal place. The largest difference is 0.2 units. This suggests that the finite-size  $pK_a$  corrections can be pre-calculated and incorporated in the reference  $pK_a$ 's in the future.

**Table S1: Volume and number of solvent in the simulations of proteins and model compounds**

| System    | $L$ (Å) | $V^{\text{sim}}$ (Å <sup>3</sup> ) | $V^{\text{est}}$ (Å <sup>3</sup> ) | $N^{\text{solv}}$ | $V^{\text{sim}}/V^{\text{est}}$ |
|-----------|---------|------------------------------------|------------------------------------|-------------------|---------------------------------|
| HP36      | 54      | $1.1242 \times 10^5 \pm 302$       | $1.2125 \times 10^5$               | 3602              | 0.92715                         |
| BBL       | 59      | $1.4666 \times 10^5 \pm 334$       | $1.5814 \times 10^5$               | 4733              | 0.92741                         |
| HEWL      | 69      | $2.3561 \times 10^5 \pm 404$       | $2.5295 \times 10^5$               | 7343              | 0.93145                         |
| SNase     | 70      | $2.4186 \times 10^5 \pm 447$       | $2.6411 \times 10^5$               | 7515              | 0.91575                         |
| Model Asp | 30      | $2.5159 \times 10^4 \pm 220$       | $2.7000 \times 10^4$               | 842               | 0.93181                         |
| Model Glu | 30      | $2.5217 \times 10^4 \pm 220$       | $2.7000 \times 10^4$               | 843               | 0.93396                         |
| Model His | 30      | $2.5142 \times 10^4 \pm 227$       | $2.7000 \times 10^4$               | 838               | 0.93119                         |

$L$  denotes the unit-cell lattice parameter of the truncated octahedron (for proteins) and cubic box (for model compounds). The simulation box volume  $V^{\text{sim}}$  was taken to be the average of the values from the highest and lowest pH replicas. The last 1 ns (per replica) data was used. Note, as expected, the volume fluctuation is very small, around 0.1%. The estimated box volume  $V^{\text{est}}$  was calculated using  $L^3$  for a cubic box and  $0.77L^3$  for a truncated octahedron box.  $N^{\text{solv}}$  is the number of solvent.

**Table S2: Finite-size corrections of the protein  $pK_a$ 's**

| System | Asp  |      | Glu  |      | His  |      |
|--------|------|------|------|------|------|------|
|        | est  | sim  | est  | sim  | est  | sim  |
| HP36   | -0.6 | -0.5 | -0.6 | -0.5 | -    | -    |
| BBL    | -0.5 | -0.5 | -0.5 | -0.4 | -0.4 | -0.4 |
| HEWL   | -0.9 | -0.9 | -0.9 | -0.9 | -0.8 | -0.8 |
| SNase  | -1.1 | -0.9 | -1.1 | -0.9 | -1.0 | -0.8 |

Column est gives the  $pK_a$  corrections calculated using  $0.93 \times V_{\text{prot}}^{\text{est}}$  for the protein system, while column sim gives the  $pK_a$  corrections calculated using the simulation volume for the protein system. See text for further explanation.

**Table S3: Validation of the finite-site  $pK_a$  correction: comparison of the estimated  $pK_a$  shifts and those from the actual simulations**

| $L$ (Å)     | $\Delta G^{\text{offset}}$ (kcal/mol) | $V^{\text{sim}}$ (Å <sup>3</sup> ) | $\Delta pK_a^{\text{est}}$ | $\Delta pK_a^{\text{sim}}$ |
|-------------|---------------------------------------|------------------------------------|----------------------------|----------------------------|
| <b>HP36</b> |                                       |                                    |                            |                            |
| 43          | $\pm 16.17$                           | $5.60320 \times 10^4$              | 0.61                       | $0.41 \pm 0.06$            |
| 54*         | $\pm 17.02$                           | $1.12416 \times 10^5$              | 0.00                       | 0.00                       |
| <b>BBL</b>  |                                       |                                    |                            |                            |
| 49          | $\pm 16.58$                           | $8.21480 \times 10^4$              | 0.41                       | $0.39 \pm 0.19$            |
| 59*         | $\pm 17.15$                           | $1.46660 \times 10^5$              | 0.00                       | 0.00                       |

$L$  denotes the unit-cell lattice parameter of the truncated octahedron box. The reference box (box used in the simulations reported in the main text) is denoted with an asterisk.  $\Delta G^{\text{offset}}$  denotes the calculated offset energy in kcal/mol (Eq. 14 in the main text).  $V^{\text{sim}}$  refers to the average volume from the lowest and highest pH replicas.  $\Delta pK_a(\text{est})$  refers to the estimated  $pK_a$  shift due to the decrease in box dimension relative to that of the reference box.  $\Delta pK_a(\text{sim})$  refers to the actual average  $pK_a$  shift from two independent sets of 5-ns simulations. The standard deviations for the actual  $pK_a$  shifts are based on the shifts of all residues.

**Table S4: Calculated  $pK_a$ 's for SNase in different time windows**

| Residue     | Expt | 0-5 ns | 5-10 ns | 10-16 ns |
|-------------|------|--------|---------|----------|
| E10         | 2.8  | 3.2    | 3.2     | 3.3      |
| D19*        | 2.2  | 4.5    | 3.3     | 3.2      |
| D21*        | 6.5  | 5.5    | 6.0     | 6.3      |
| D40         | 3.9  | 2.8    | 2.9     | 3.3      |
| E43         | 4.3  | 4.3    | 4.1     | 4.2      |
| E52*        | 3.9  | 5.1    | 4.7     | 4.9      |
| E57         | 3.5  | 4.6    | 4.1     | 4.6      |
| E67         | 3.8  | 3.7    | 4.0     | 4.1      |
| E73         | 3.3  | 3.4    | 3.6     | 3.1      |
| E75         | 3.3  | 3.5    | 2.7     | 2.5      |
| D77         | <2.2 | < 0    | <0      | < 0      |
| D83         | <2.2 | 0.0    | 0.1     | 0.3      |
| D95         | 2.2  | 2.9    | 3.0     | 3.0      |
| E101*       | 3.8  | 5.0    | 4.7     | 4.7      |
| E122        | 3.9  | 4.3    | 4.4     | 4.4      |
| E129*       | 3.8  | 5.5    | 5.5     | 5.6      |
| E135*       | 3.8  | 2.9    | 2.9     | 3.1      |
| <i>max</i>  |      | 2.3    | 1.7     | 1.8      |
| <i>avg</i>  |      | 0.83   | 0.70    | 0.69     |
| <i>rmsd</i> |      | 1.0    | 0.80    | 0.81     |

Residues denoted with an asterisk show an absolute deviation greater than 0.6 and are discussed in the main text.

**Table S5: Parameters in the model PMF functions for PME-CpHMD simulations**

|                        | Asp    | Glu    | His    | Lys    | H <sub>3</sub> O <sup>+</sup> | OH <sup>-</sup> |
|------------------------|--------|--------|--------|--------|-------------------------------|-----------------|
| <i>A</i>               | -      | -      | -      | -80.32 | -98.12                        | -117.86         |
| <i>B</i>               | -      | -      | -      | 0.63   | 0.10                          | 1.03            |
| <i>A</i> <sub>1</sub>  | -74.78 | -75.21 | -53.4  | -      | -                             | -               |
| <i>B</i> <sub>1</sub>  | 0.11   | 0.080  | 0.38   | -      | -                             | -               |
| <i>A</i> <sub>0</sub>  | -74.40 | -74.69 | -53.88 | -      | -                             | -               |
| <i>B</i> <sub>0</sub>  | 0.10   | 0.078  | 0.52   | -      | -                             | -               |
| <i>A</i> <sub>10</sub> | -11.11 | -10.98 | -47.04 | -      | -                             | -               |
| <i>B</i> <sub>10</sub> | 0.50   | 0.50   | 0.34   | -      | -                             | -               |
| <i>a</i> <sub>0</sub>  | 0.0052 | 0.78   | 0.0    | -      | -                             | -               |
| <i>a</i> <sub>1</sub>  | 10.68  | 9.73   | 0.0    | -      | -                             | -               |
| <i>a</i> <sub>2</sub>  | -10.67 | -10.48 | 0.0    | -      | -                             | -               |
| <i>a</i> <sub>3</sub>  | 0.5    | 0.5    | 0.0    | -      | -                             | -               |
| <i>a</i> <sub>4</sub>  | -74.67 | -75.14 | 0.0    | -      | -                             | -               |
| <i>a</i> <sub>5</sub>  | 0.10   | 0.078  | 0.0    | -      | -                             | -               |
| <i>β</i>               | 2.0    | 2.0    | 2.0    | 2.0    | 0.5                           | 0.5             |

Coefficient names follow those in the Supplementary Materials of Ref.<sup>1</sup> The coefficients were initially obtained using a fitting procedure as detailed in Ref.<sup>1</sup>) followed by model compound simulations (5 for each model). The average p*K*<sub>a</sub>'s out of 5 sets of test simulations were: Lys 10.4; Asp 4.1; Glu 4.6 and His 6.2. Then, small adjustment was made to *B*<sub>0</sub> (*a*<sub>5</sub>) to match the reference p*K*<sub>a</sub> values of Asp and Glu. To match the reference p*K*<sub>a</sub> of His, small adjustments were made to *B*<sub>1</sub>, *B*<sub>0</sub> and *B*<sub>10</sub>.

**Table S6: Calculated  $pK_a$ 's of four proteins with two  $\lambda$  cutoffs**

| Residue     | Expt | Calc    |         | Residue                  | Expt | Calc    |         |
|-------------|------|---------|---------|--------------------------|------|---------|---------|
|             |      | 0.1/0.9 | 0.2/0.8 |                          |      | 0.1/0.9 | 0.2/0.8 |
| <b>HP36</b> |      |         |         | <b>SNase</b>             |      |         |         |
| Asp44       | 3.1  | 2.6     | 2.6     | Glu10                    | 2.8  | 3.2     | 3.2     |
| Glu45       | 4.0  | 3.8     | 3.8     | Asp19                    | 2.2  | 3.3     | 3.3     |
| Asp46       | 3.5  | 3.9     | 4.0     | Asp21                    | 6.5  | 6.0     | 6.1     |
| Glu72       | 4.4  | 4.5     | 4.6     | Asp40                    | 3.9  | 2.9     | 3.0     |
| <b>BBL</b>  |      |         |         | Glu43                    |      |         |         |
| Asp129      | 3.9  | 3.7     | 3.8     | Glu52                    | 4.3  | 4.1     | 4.1     |
| Glu141      | 4.5  | 4.3     | 4.3     | Glu57                    | 3.9  | 4.7     | 4.8     |
| His142      | 6.5  | 5.4     | 5.5     | Glu67                    | 3.5  | 4.1     | 4.1     |
| Asp145      | 3.7  | 3.4     | 3.5     | Glu73                    | 3.8  | 4.0     | 4.0     |
| Glu161      | 3.7  | 4.0     | 4.0     | Glu75                    | 3.3  | 3.6     | 3.6     |
| Asp162      | 3.2  | 2.7     | 2.7     | Asp77                    | 3.3  | 2.7     | 2.7     |
| Glu164      | 4.5  | 4.3     | 4.3     | Asp83                    | <2.2 | <-1     | <-1     |
| His166      | 5.4  | 4.1     | 4.1     | Asp95                    | <2.2 | 0.1     | 0.0     |
| <b>HEWL</b> |      |         |         | Glu101                   |      |         |         |
| Glu7        | 2.6  | 3.2     | 3.2     | Glu122                   | 2.2  | 3.0     | 2.9     |
| His15       | 5.5  | 4.0     | 4.1     | Glu129                   | 3.8  | 4.7     | 4.7     |
| Asp18       | 2.8  | 2.9     | 2.9     | Glu135                   | 3.9  | 4.4     | 4.4     |
| Glu35       | 6.1  | 7.1     | 7.2     |                          | 3.8  | 5.5     | 5.5     |
| Asp48       | 1.4  | 0.9     | 0.9     |                          | 3.8  | 2.9     | 2.9     |
| Asp52       | 3.6  | 5.6     | 5.6     |                          |      |         |         |
| Asp66       | 1.2  | 1.1     | 1.1     |                          |      |         |         |
| Asp87       | 2.2  | 2.3     | 2.3     | <i>rmsd</i>              |      | 0.77    | 0.76    |
| Asp101      | 4.5  | 5.2     | 5.2     | <i>regression slope</i>  |      | 0.98    | 1.01    |
| Asp119      | 3.5  | 3.5     | 3.5     | <i>regression interc</i> |      | 0.06    | 0.11    |

Experimental  $pK_a$  values were determined by NMR titration for HP36,<sup>2</sup> BBL,<sup>3,4</sup> HEWL<sup>5</sup> and SNase.<sup>6</sup> The  $pK_a$ 's were based on the last 5 ns of the 10-ns (per replica) simulations. Column 0.1/0.9 or 0.2/0.8 indicates the cutoffs  $\lambda^P/\lambda^U$ . For example, the cutoffs 0.1/0.9 define the protonated state as  $\lambda < 0.1$  and the deprotonated state as  $\lambda > 0.9$ . In the presence of tautomer states, the same cutoffs are used for the tautomer variable  $x$ . For 0.1/0.9, the protonated state is defined as  $\lambda < 0.1$  with  $x < 0.1$  or  $x > 0.9$ ; the deprotonated state is defined as  $\lambda > 0.9$  with  $x < 0.1$  or  $x > 0.9$ .

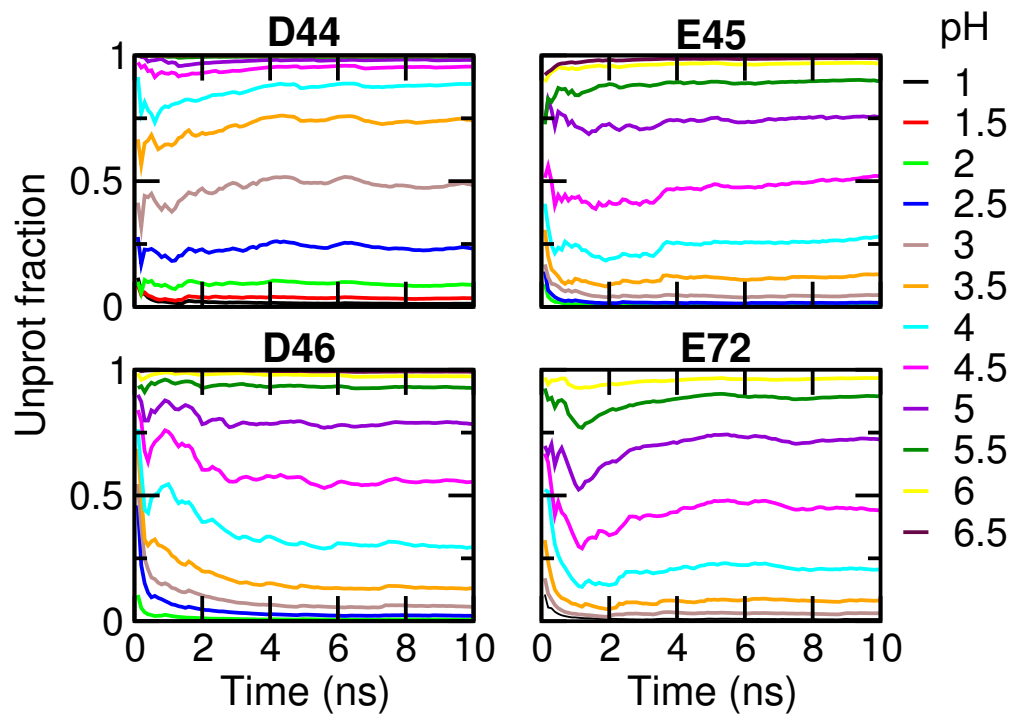

Figure S1: **Convergence of protonation-state sampling for HP36.** Unprotonated fractions cumulatively calculated as a function of time.

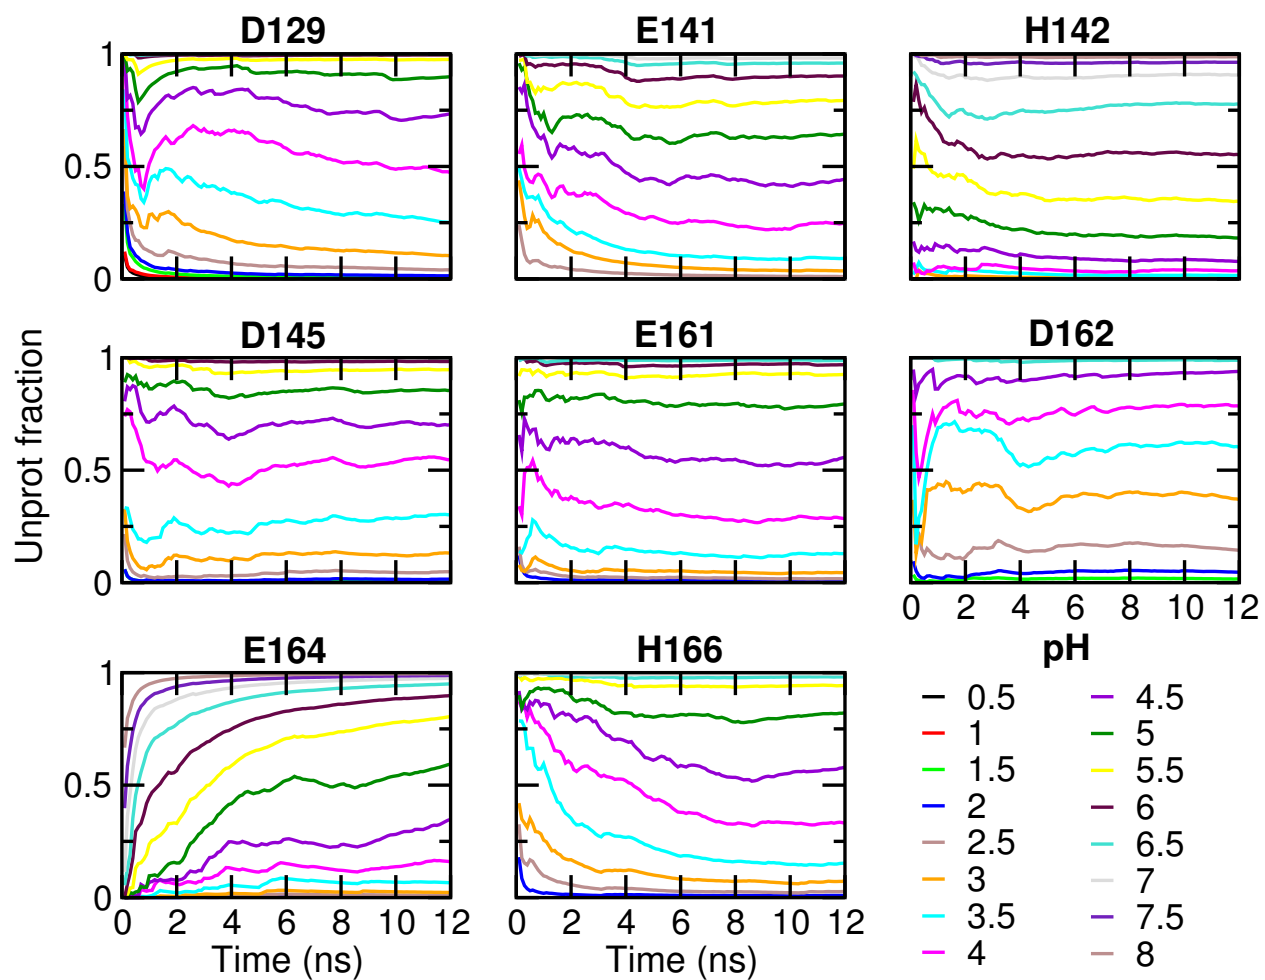

Figure S2: **Convergence of protonation-state sampling for BBL.** Unprotonated fractions cumulatively calculated as a function of time.



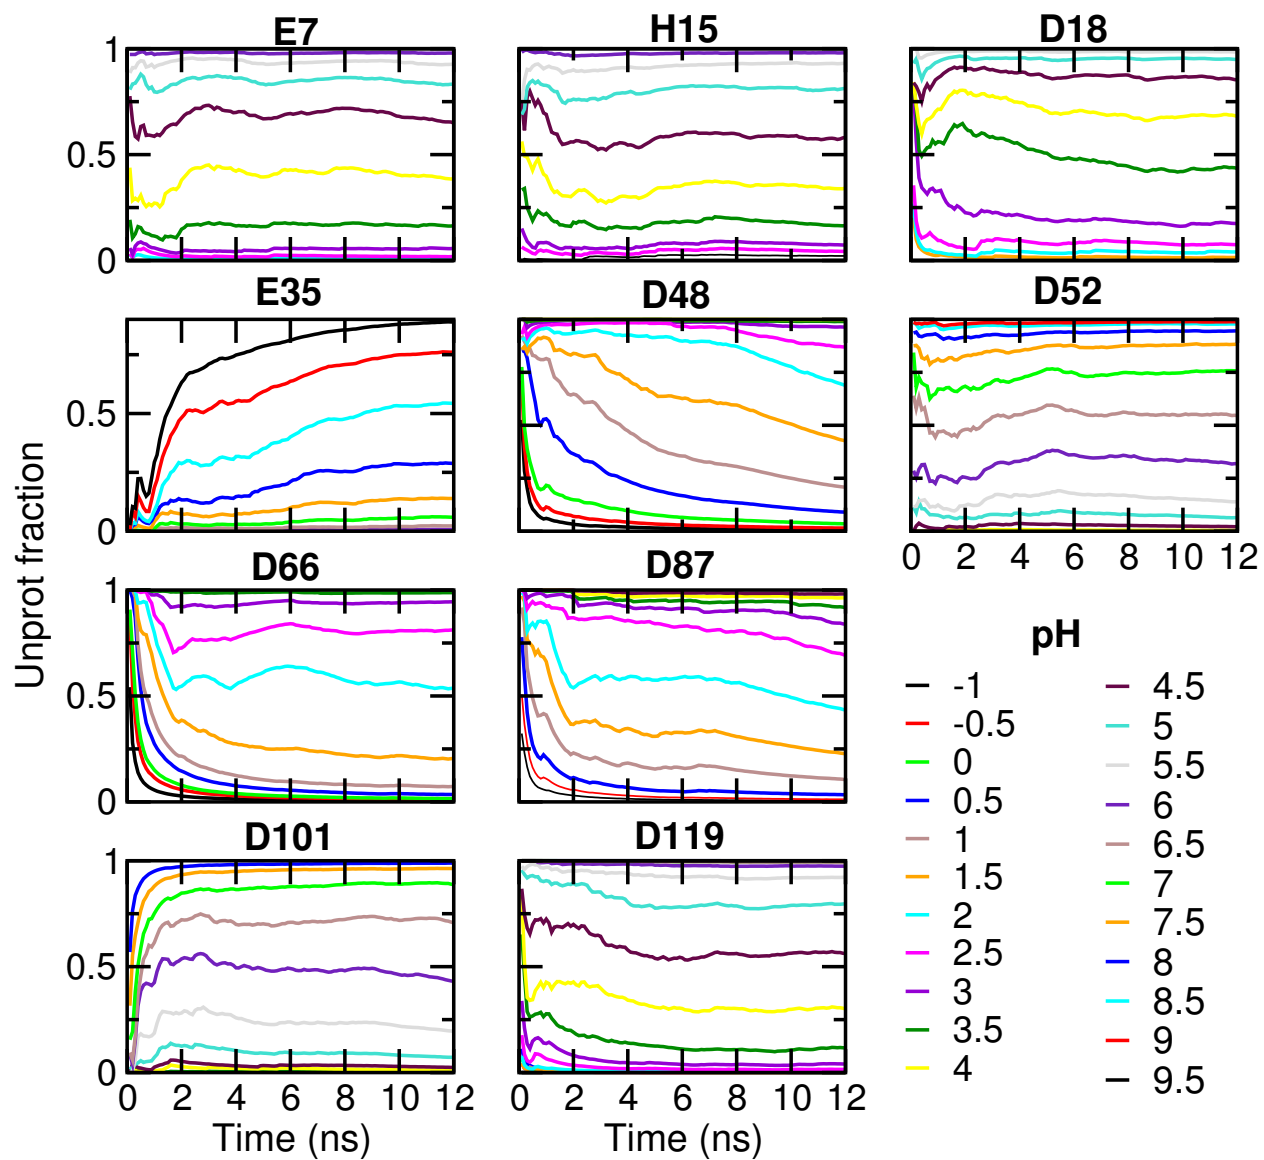

Figure S3: **Convergence of protonation-state sampling for HEWL.** Unprotonated fractions cumulatively calculated as a function of time.

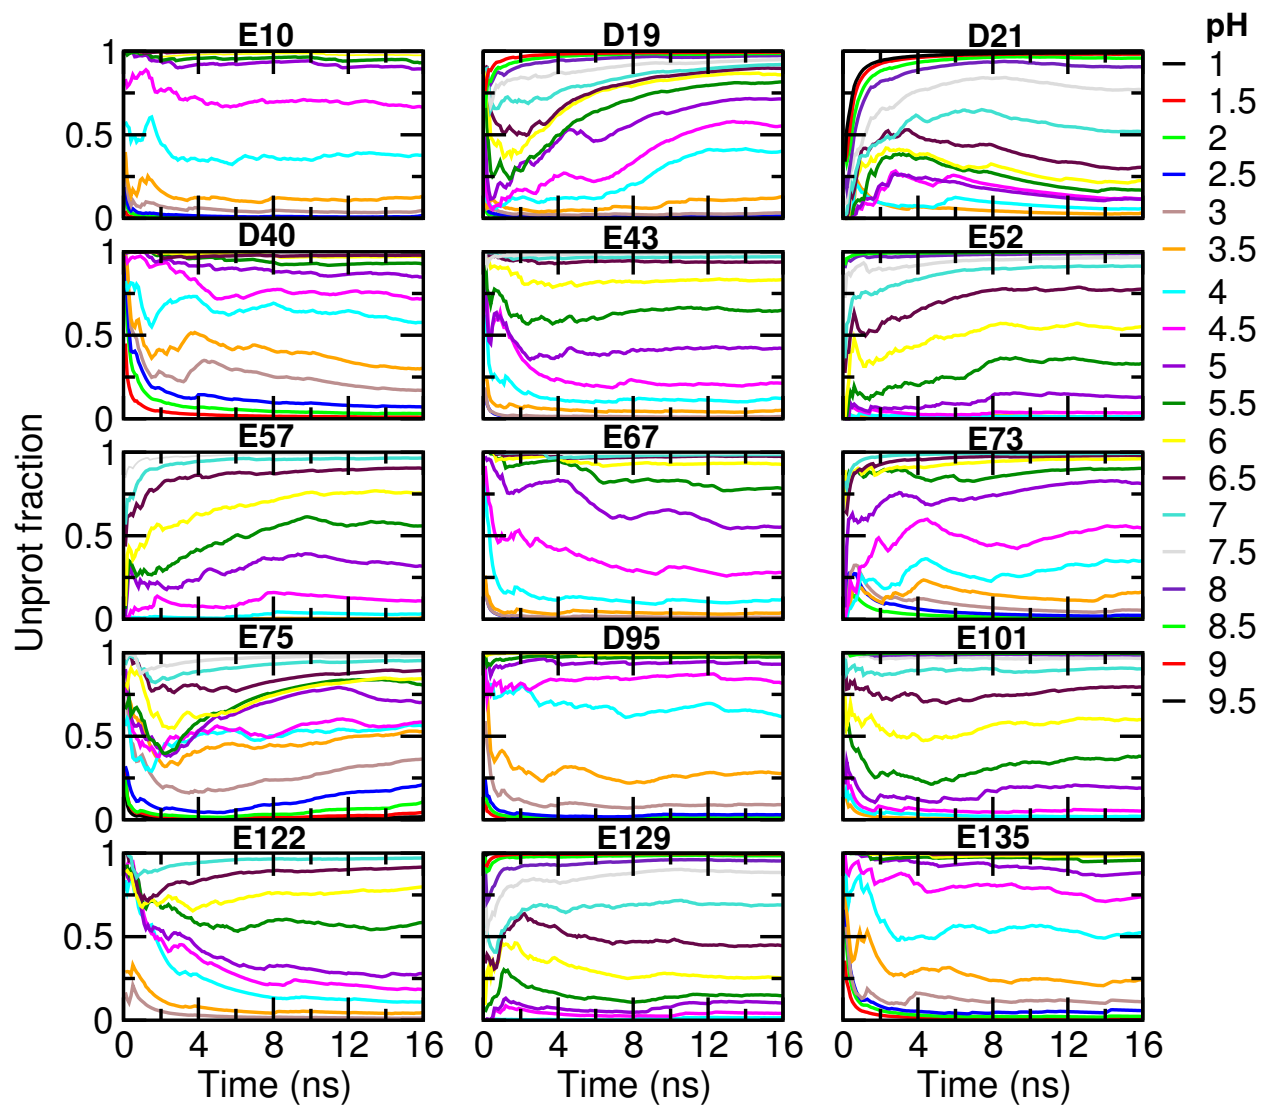

Figure S4: **Protonation-state sampling for SNase is converged with 16-ns (per replica) sampling.** Unprotonated fractions cumulatively calculated as a function of time. Note simulation was carried out to 16 ns per replica.

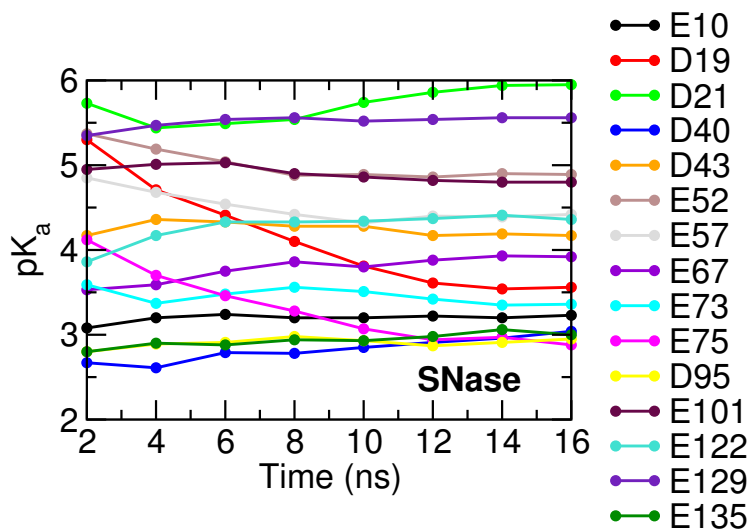

Figure S5: **Calculated  $pK_a$ 's for SNase are converged with 16-ns per replica sampling.**  $pK_a$  calculation was performed every 2 ns per replica based on the cumulative values of the unprotonated fractions at all pH.

## Analysis of $pK_a$ 's errors

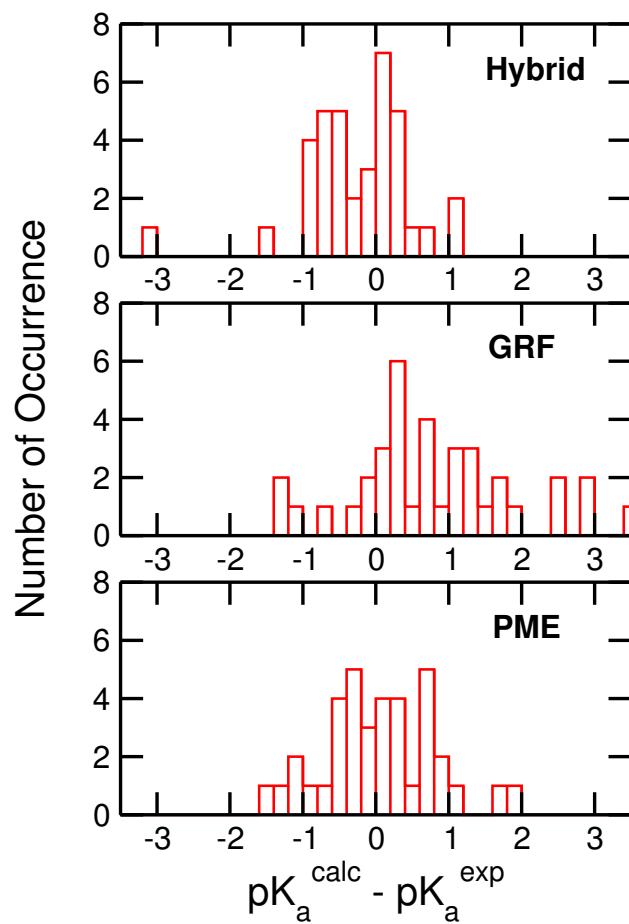

Figure S6: Histogram of the deviations between calculated and experimental  $pK_a$ 's.

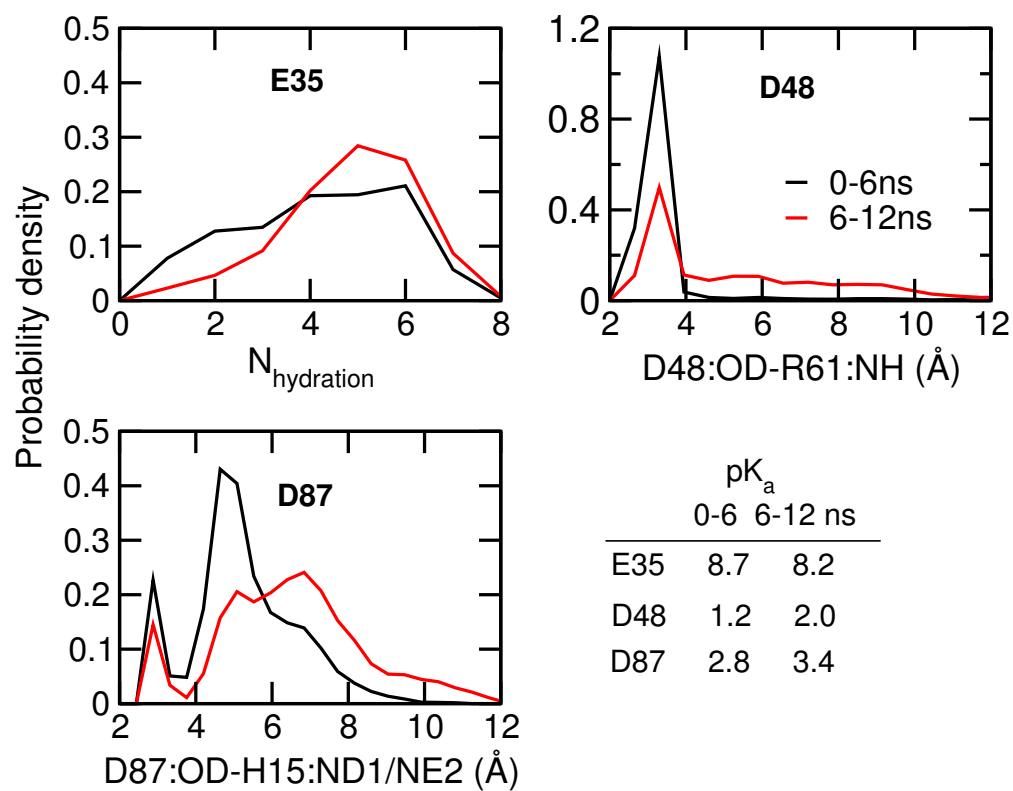

Figure S7: Improved  $pK_a$ 's in the second half of the simulation of HEWL. Left. The hydration number of Glu35 at pH 9.5. Right. The distance between Asp48 and Arg61 at pH 2. The selected pH conditions are slightly higher than the uncorrected  $pK_a$  values. The first and second half of the simulation are displayed in black and red, respectively.

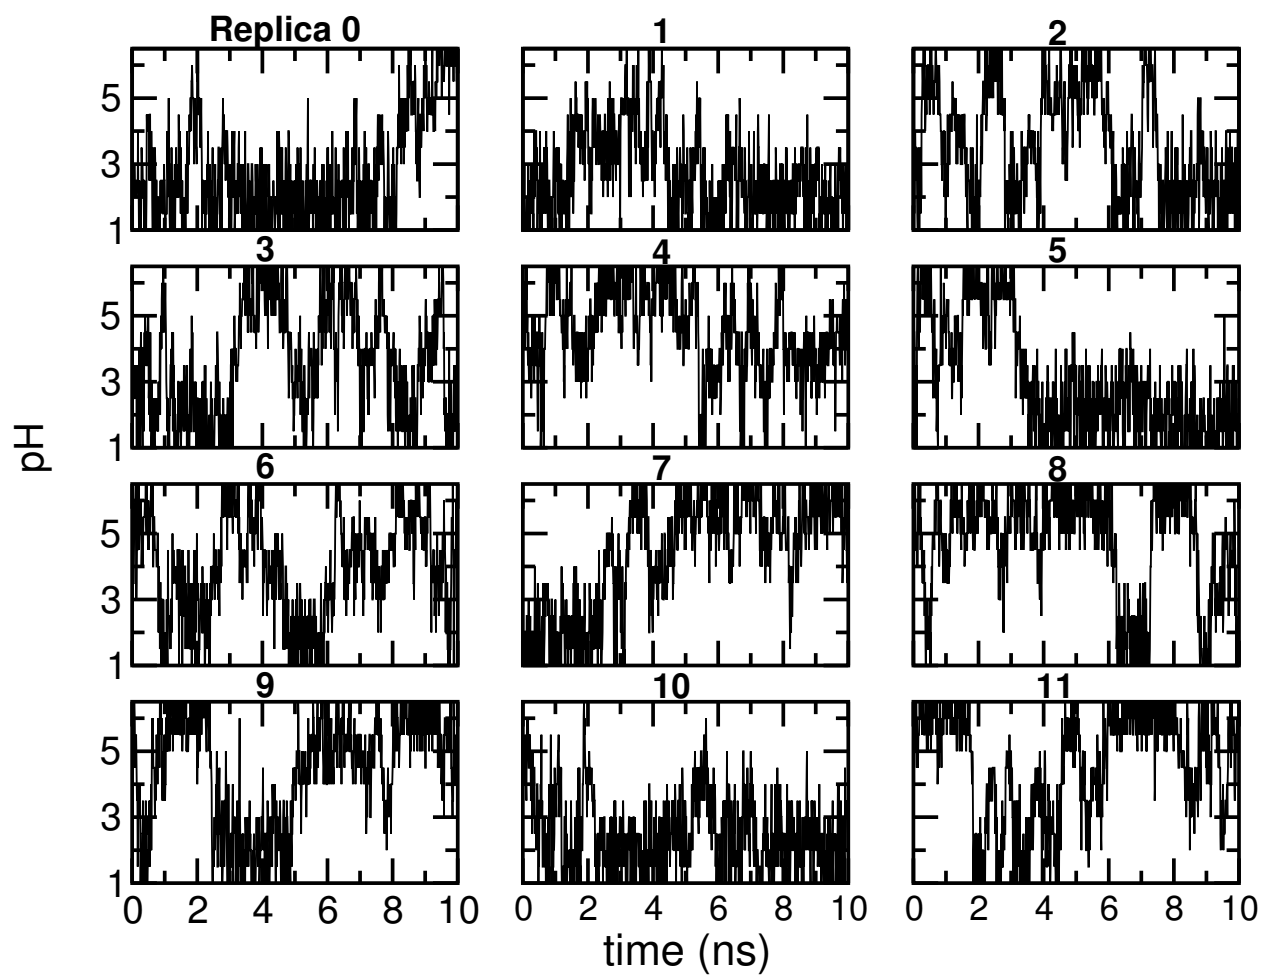

Figure S8: Replica walk in the pH-REX CpHMD simulation of HP36.

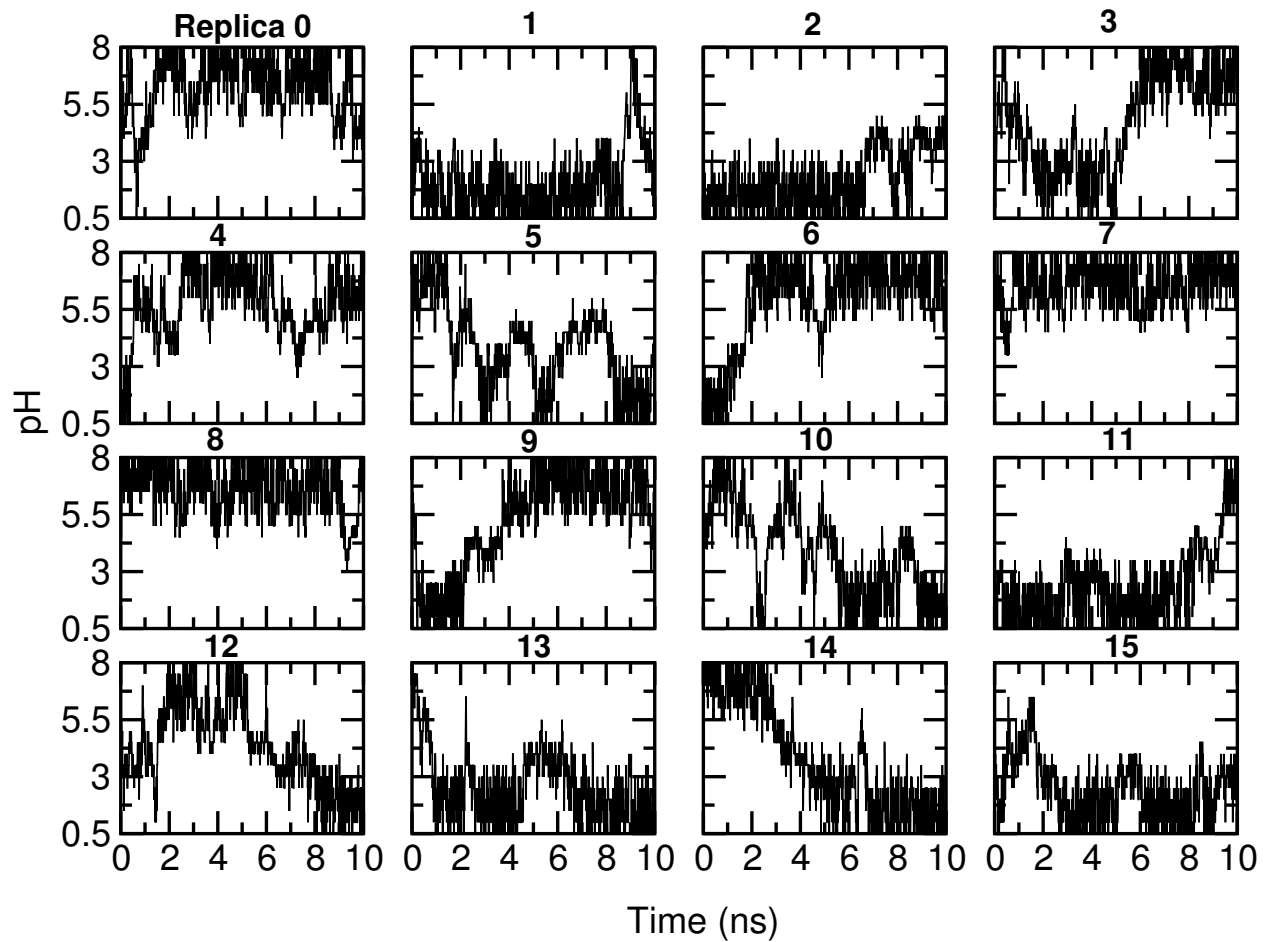

Figure S9: Replica walk in the pH-REX CpHMD simulation of BBL.

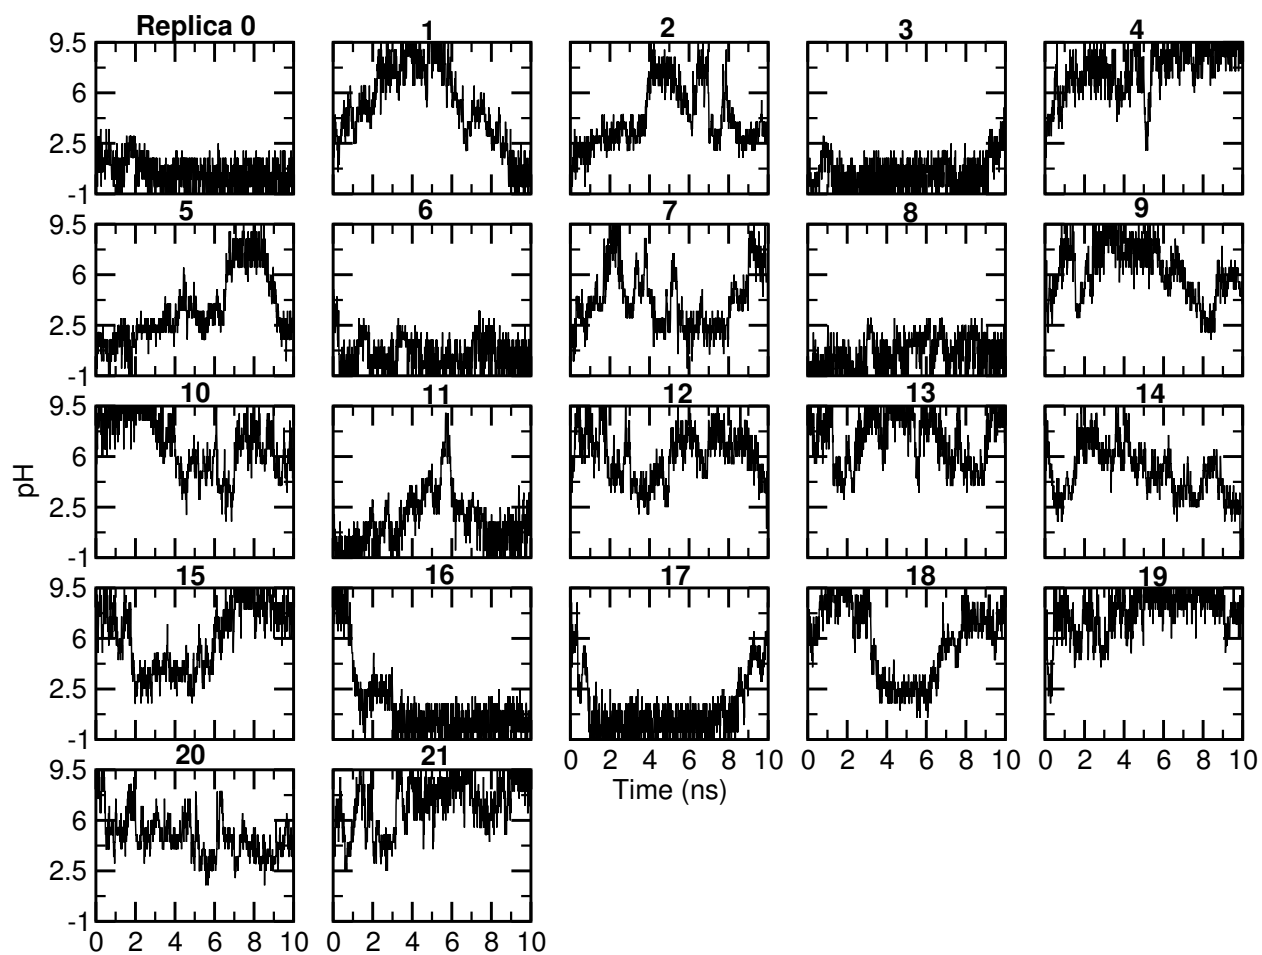

Figure S10: Replica walk in the pH-REX CpHMD simulation of HEWL.



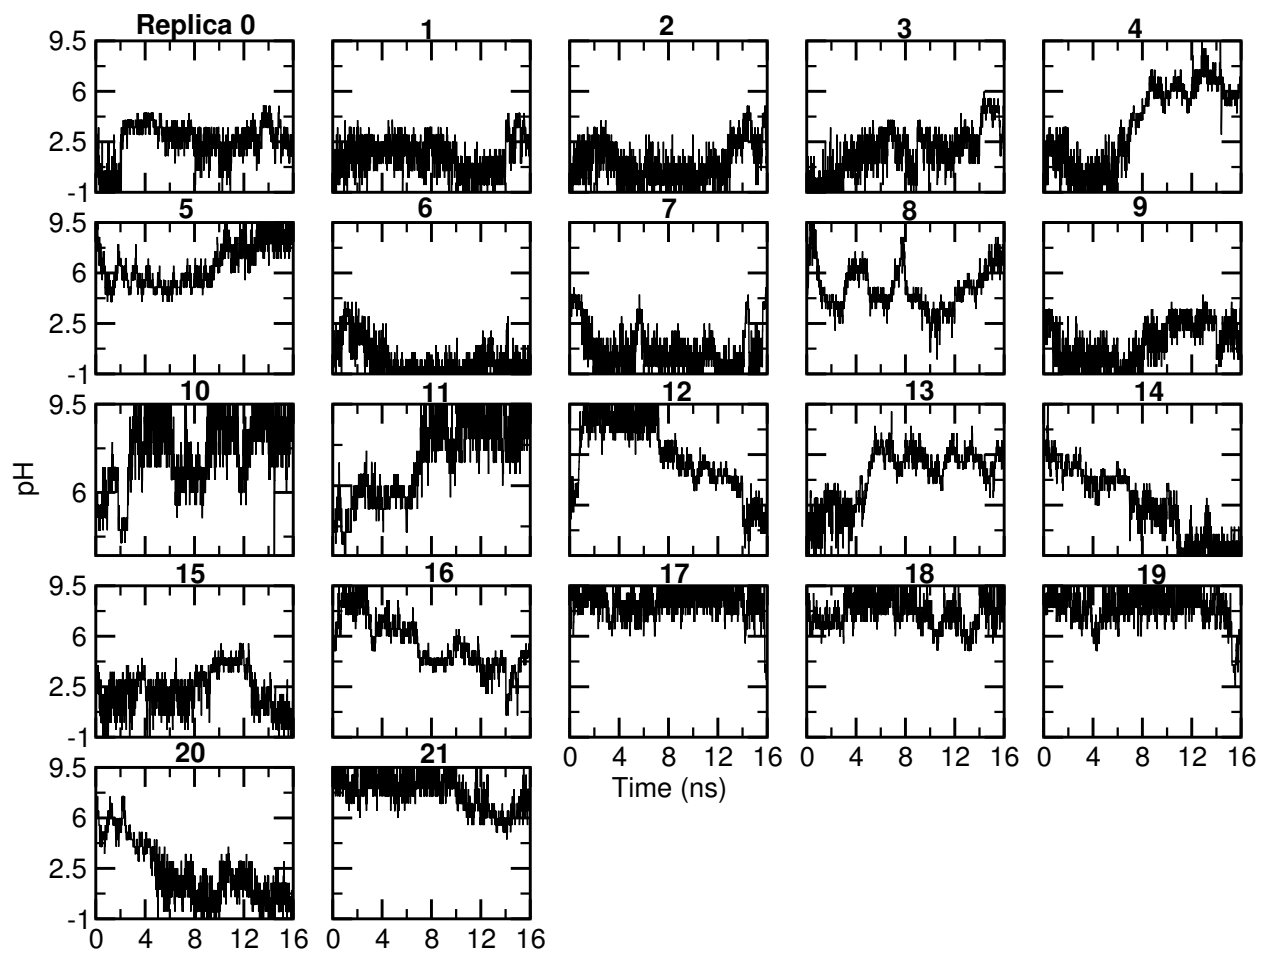

Figure S11: Replica walk in the pH-REX CpHMD simulation of SNase.

## References

- (1) Khandogin, J.; Brooks III, C. L. Constant pH molecular dynamics with proton tautomerism. *Biophys. J.* **2005**, *89*, 141–157.
- (2) Xiao, S.; Patsalo, V.; Shan, B.; Bi, Y.; Green, D. F.; Raleigh, D. P. Rational modification of protein stability by targeting surface sites leads to complicated results. *Proc. Natl. Acad. Sci. USA* **2013**, *110*, 11337–11342.
- (3) Arbely, E.; Rutherford, T. J.; Sharpe, T. D.; Ferguson, N.; Fersht, A. R. Downhill versus barrier-limited folding of BBL 1: energetic and structural perturbation effects upon protonation of a histidine of unusually low pK<sub>a</sub>. *J. Mol. Biol.* **2009**, *387*, 986–992.
- (4) Arbely, E.; Rutherford, T. J.; Neuweiler, H.; Sharpe, T. D.; Ferguson, N.; Fersht, A. R. Carboxyl pK<sub>a</sub> values and acid denaturation of BBL. *J. Mol. Biol.* **2010**, *403*, 313–327.
- (5) Webb, H.; Tynan-Connolly, B. M.; Lee, G. M.; Farrell, D.; O'Meara, F.; Søndergaard, C. R.; Teilum, K.; Hewage, C.; McIntosh, L. P.; Nielsen, J. E. Remeasuring HEWL pK<sub>a</sub> values by NMR spectroscopy: methods, analysis, accuracy, and implications for theoretical pK<sub>a</sub> calculations. *Proteins* **2011**, *79*, 685–702.
- (6) Castañeda, C. A.; Fitch, C. A.; Majumdar, A.; Khangulov, V.; Schlessman, J. L.; García-Moreno E., B. Molecular determinants of the pK<sub>a</sub> values of Asp and Glu residues in staphylococcal nuclease. *Proteins* **2009**, *77*, 570–588.
